# Supplementary material for: Development of an analytical method to determine malondialdehyde as an oxidative marker in cryopreserved bovine semen
Source: Royal Society of Chemistry journal article supplement (doi:10.1039/c5ay00950b), 2015-01-01

## Supplementary Information

### Development of an analytical method to determine malondialdehyde as an oxidative marker in cryopreserved bovine semen

Melisa E. Yonny,<sup>a</sup> Pablo S. Reineri,<sup>a</sup> Gustavo A. Palma<sup>a</sup> and Mónica A. Nazareno\*<sup>a</sup>

<sup>a</sup>Centro de Investigaciones y Transferencia Santiago del Estero (CITSE)-CONICET-Universidad Nacional de Santiago del Estero (UNSE), RN 9 Km 1125, Villa El Zanjón, CP 4206, Santiago del Estero, Argentina. E-mail: nazareno@ unse.edu.ar; manazar2004@yahoo.com; Tel: +54-385-4221563

<sup>b</sup>Instituto Nacional de Tecnología Agropecuaria, Santiago del Estero, Argentina

**Fig. A Electronic Supplementary Data:** Time profile for hydrolysis of bound protein MDA in treatment B of cryopreserved bovine semen samples. Empty circle (○): HPLC analysis. Full circle (●): Spectrophotometric analysis.

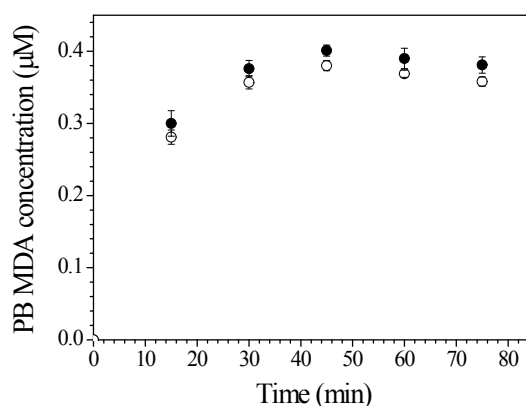

**Fig. B Electronic Supplementary Data:** Long-term stability of MDA-TBA<sub>2</sub> condensation product in cryopreserved bovine semen samples using treatment A by HPLC-DAD (left) and the traditional spectrophotometric method (right). Empty circle (○): 25 °C. Full circle (●): -20 °C. Half circle (◐): 8 °C.

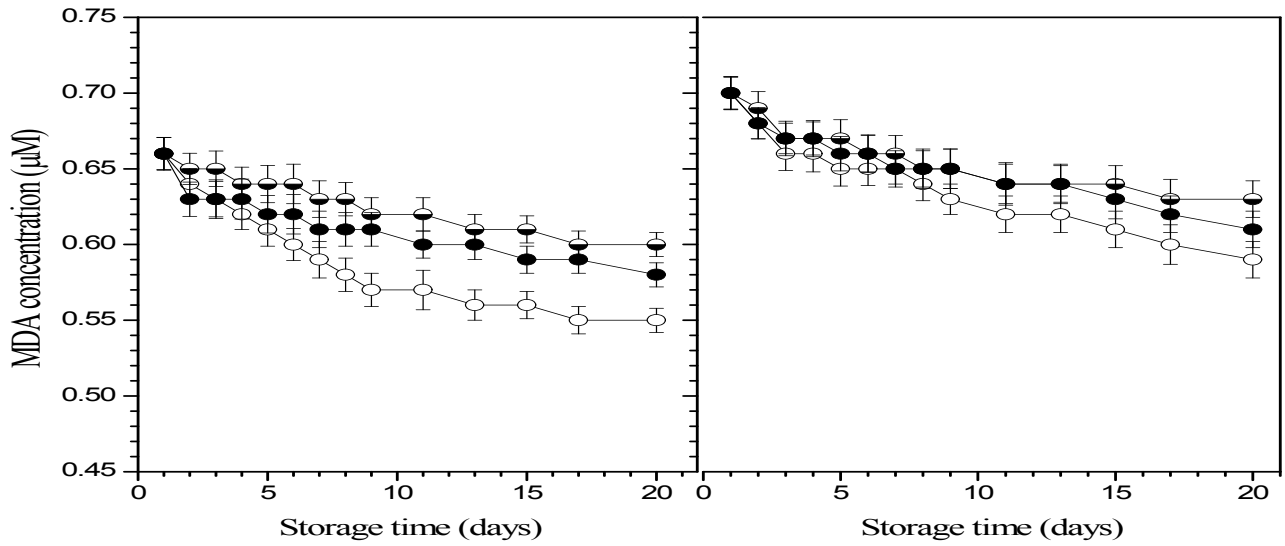

Supplement: c5ay00950b1.pdf [file c5ay00950b1.pdf]
